# Supplementary material for: Modification of Cv. Merlot Berry Composition and Wine Sensory Characteristics by Different Leaf Area to Fruit Ratios
Source: MDPI journal article supplement (doi:10.3390/app13095465), 2023-04-27
Supplement: s1 [file s1]

**Table S1.** Sensory descriptors and definitions of the attributes used in the quantitative descriptive sensory analysis of Merlot red wines, rated on a scale from 0 to 10 (0 = descriptor not perceptible; 10 = descriptor strongly perceptible).

| <b>Attribute</b>            | <b>Definition</b>                                                                                             |
|-----------------------------|---------------------------------------------------------------------------------------------------------------|
| <i>Appearance</i>           |                                                                                                               |
| Color intensity             | Intensity of the color of the wine sample, from pale to dark                                                  |
| <i>Aroma</i>                |                                                                                                               |
| Aroma intensity             | Overall intensity of aromas in the wine sample                                                                |
| Aroma complexity            | Intensity of different types of aromas in the wine sample (fruity, floral, vegetal, spicy)                    |
| Vegetal aroma               | Intensity of the 'green' aromas: grassy, mint, green capsicum, cooked vegetables                              |
| Red berry aroma             | Intensity of the aroma of red berry fruits: raspberries, strawberries, cherries                               |
| Dark berry aroma            | Intensity of the aroma of dark berry fruits: blackberry, blueberry, prunes                                    |
| <i>Flavor</i>               |                                                                                                               |
| Acidity                     | Intensity of sour taste in the mouth                                                                          |
| Body                        | Intensity of mouthfeel of overall taste in the mouth                                                          |
| Bitterness                  | Intensity of bitter taste in the mouth                                                                        |
| Coarse astringency          | Intensity of negative astringency taste in the mouth, perceived as coarse, grainy, dry or puckery astringency |
| Velvety astringency         | Intensity of positive astringency taste in the mouth, perceived as velvety or silky astringency               |
| Tannin perception intensity | Intensity of tannin perception in the mouth, including coarse astringency, velvety astringency and bitterness |
| Persistency                 | Persistence of flavor and aroma in the mouth                                                                  |
| Taste balance               | Balance between acidity, body, sweetness and astringency/bitterness perception in the mouth                   |
| <i>Overall wine quality</i> | Overall positive aroma and flavor perception of wine, including aftertaste                                    |
